# Supplementary material
Source: bioRxiv or medRxiv preprint supplement (https://www.biorxiv.org/highwire/filestream/85400/field_highwire_adjunct_files/0/277400-1.pdf)
Supplement: Supplementary file [file 277400-1.pdf]

**Table S1**

| Species                    | Strain  | Accession              | Status                                  |
|----------------------------|---------|------------------------|-----------------------------------------|
| <b>Group A</b>             |         |                        |                                         |
| <i>S. aureus</i>           | USA300  | CP000255<br>(Uid58555) | Complete<br>Diep <i>et al.</i> , 2006.  |
| <i>S. epidermidis</i>      | RP62A   | CP000029<br>(Uid57663) | Complete<br>Gill <i>et al.</i> , 2005.  |
| <i>S. hominis</i>          | J11     | LT963438               | Draft<br>(This study)                   |
| <b>Group B</b>             |         |                        |                                         |
| <i>S. saprophyticus</i>    | CCM_833 | LT963436               | Draft<br>(This study)                   |
| <b>Group C</b>             |         |                        |                                         |
| <i>S. pseudintermedius</i> | ED99    | Uid162109              | Complete<br>Zakour <i>et al.</i> , 2011 |

Diep BA, Gill SR, Chang RF, Phan TH, Chen JH, Davidson MG, Lin F, Lin J, Carleton HA, Mongodin EF, Sensabaugh GF, Perdreau-Remington F. 2006. Complete genome sequence of USA300, an epidemic clone of community-acquired methicillin-resistant *Staphylococcus aureus*. *Lancet*. **367**:731-739.

Gill SR, Fouts DE, Archer GL, Mongodin EF, Deboy RT, Ravel J, Paulsen IT, Kolonay JF, Brinkac L, Beanan M, Dodson RJ, Daugherty SC, Madupu R, Angiuoli SV, Durkin AS, Haft DH, Vamathevan J, Khouri H, Utterback T, Lee C, Dimitrov G, Jiang L, Qin H, Weidman J, Tran K, Kang K, Hance IR, Nelson KE, Fraser CM. 2005. Insights on Evolution of Virulence and Resistance from the Complete Genome Analysis of an Early Methicillin-Resistant *Staphylococcus aureus* Strain and a Biofilm-Producing Methicillin-Resistant *Staphylococcus epidermidis* Strain. *J Bacteriol* **187**:2426-2438.

Zakour NLB, Bannoehr J, van den Broek AHM, Thoday KL, Fitzgerald JR. 2011. Complete Genome Sequence of the Canine Pathogen *Staphylococcus pseudintermedius*. *J Bacteriol* **193**:2363-2364.
